# Supplementary material for: Facile fabrication and characterization of aliphatic polyketone (PK) micro/nano fiber membranes via electrospinning and a post treatment process
Source: Royal Society of Chemistry journal article supplement (doi:10.1039/d0ra08119a), 2020-12-24
Supplement: d0ra08119a1.pdf [file d0ra08119a1.pdf]

## Facile Fabrication and Characterization of Aliphatic Polyketone (PK) Micro/nano Fiber Membranes via Electrospinning and Post Treatment Process

Jian Hou,<sup>a,b</sup> Chanju Park,<sup>b</sup> Wongi Jang,<sup>b</sup> and Hongsik Byun<sup>b\*</sup>

<sup>a</sup>Department of Chemical Engineering, Zibo Vocational Institute, Zibo, 255314, China

<sup>b</sup>Department of Chemical Engineering, Keimyung University, Daegu, 42601, South Korea

\*Corresponding author's e-mail: [hsbyun@kmu.ac.kr](mailto:hsbyun@kmu.ac.kr)

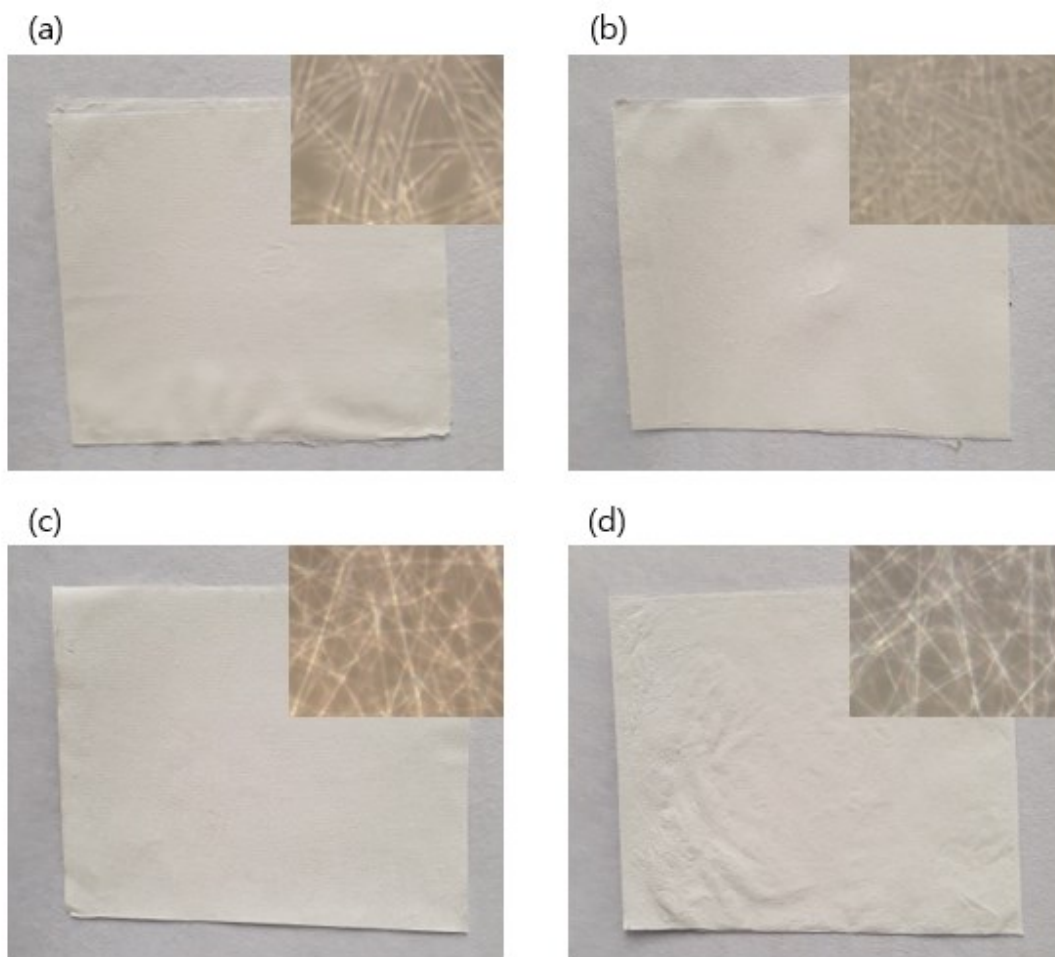

Figure S1. Digital camera photos and optical microscope images(inset) of PK micro/nano fiber membranes: (a) PK-LH, (b) PK-HH, (c) PK-NaCl, (d) rPK-NaCl.

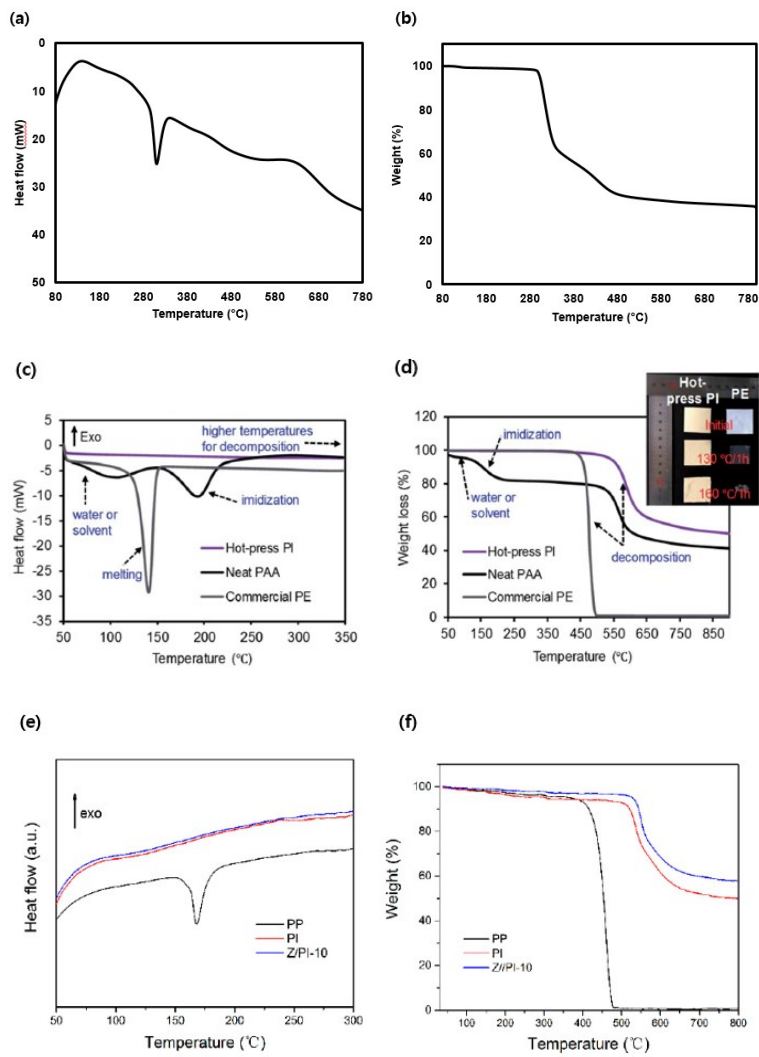

Figure S2. Thermal analysis of PAN, PE and PP membranes: (a) Differential scanning calorimeter (DSC) curve of PAN nanofiber membrane, (b) Thermogravimetric analysis (TGA) curve of PAN nanofiber membrane, (c) DSC curve of PE membrane, (d) TGA curve of PE membrane, (e) DSC curve of PP membrane, (f) TGA curve of PP membrane.
